# Supplementary material
Source: publisher figshare collection journal article supplement (https://aacr.figshare.com/ndownloader/files/39863750)
Supplement: Supplementary file 1 [file 39863750]

**Supplementary Tables**

**Supplementary Table S1. miRNAs and siRNA target sequences**

| siRNAs | Target gene | Target sequences (5′ to 3′) |
| --- | --- | --- |
| Gli1  Gli2  Nkx2-2  BTG2  LATS1  Dicer  FoxD1 | GUCCUCGACUUGAACAUUA (#1)  CCUUCACCAUGCCAUGAAA (#2)  GCGCAGCAAGGUCAAGACC (#1)  GUGACACCAACCAGAACAA (#2)  CCAUGCCUCUCCUUCUGAA (#1)  UCUACGACAGCAGCGACAA (#2)  GTGGGTGGACCCCTATGAGGT (#1)  CTCCATCTGCGTCTTGTACGA (#2)  GAAATTCGGGAATCCCTTAGG (#1)  AGCAATTGAATTCATTAGTAA (#2)  GGGCACCCAUCUCUAAUUA (#1)  GGACCAUUUACUGACAGAA (#2)  GAGAUCUGUGAGUUCAUCAGC (#1)  UUCUCCAUCGAGAGCAUCAUC (#2) |
| **miRNA mimics** | **miRNA name** | **Sequence (5**′ **to 3**′**)** |
| miR-103a mimics  miR-107 mimics  Ctrl | AGCAGCAUUGUACAGGGCUAUGA  AGCAGCAUUGUACAGGGCUAUCA  UUCUCCGAACGUGUCACGUTT |

**Supplementary Table S2. Primers used for qRT-PCR analysis**

| Gene | Primers (5′ to 3′) |
| --- | --- |
| mmu-Nkx2.2  mmu-Nkx2.2AS  hsa-Nkx2.2  hsa-Nkx2.2AS  BTG2  LATS1  mmu-miR-103-1  mmu-miR-107  has-miR-103a  has-miR-107  hsa-miR-548m  has-mir-92b-5p  has-mir-221-5p  has-mir-631  has-mir-539-5p  has-mir-520a-5p  has-mir-211-3p  has-mir-525-5p  has-mir-204  has-mir-211 | Forward: AAGAATTTCAAAACCGACGGA  Reverse: CCTCAAATCCACAGATGACCAGA  Forward: CCGGGCACGTTTCATCTTG  Reverse: AAGTTCCTCTGTTGGTGGGA  Forward: GACAACTGGTGGCAGATTTCGCTT  Reverse: AGCCACAAAGAAAGGAGTTGGACC  Forward: ACATTAACGCTGGGACGGTT  Reverse: CCCCCAGCTCTGCCCAT  Forward: CTGGGCAGAGAGTGAAAAG  Reverse: CTTCCATCCTAACCCCAAT  Forward: GAAGCAGTATACATGCCTTTGG  Reverse: CACTGGACAATGCATAACAGTATC  AGCAGCATTGTACAGGGCTATGA  AGCAGCATTGTACAGGGCTATCA  AGCAGCATTGTACAGGGCTATGA  AGCAGCATTGTACAGGGCTATCA  CAAAGGTATTTGTGGTTTTTG  AGGGACGGGACGCGGTGCAGTG  acctggcatacaatgtagattt  agacctggcccagacctcagc  ggagaaattatccttggtgtgt  ctccagagggaagtactttct  gcagggacagcaaaggggtgc  ctccagagggatgcactttct  ttccctttgtcatcctatgcct  ttccctttgtcatccttcgcct |

**Supplementary Table S3. Antibodies used for Western blotting (WB), immunohistochemistry (IHC), immunofluorescent staining (IF), flow cytometry (FCM), chromatin immunoprecipitation (ChIP) and RNA immunoprecipitation (RIP)**

| Antigen | Applications | Source |
| --- | --- | --- |
| Gli1  Gli2  Gli2  BTG2  LATS1  LATS2  YAP1  LATS1/2  Phalloidine (FITC-conjugated)  Nestin  Dicer  FoxD1  β-actin  Nkx2.2  Nkx2.2  GAB1  Argonaute 2  GFP  CD133 (PE-conjugated)  CD15/SSEA-1  (PerCP-Cy5.5 conjugated)  Mouse IgG  Rabbit IgG  Rat IgG1 (PE-conjugated)  Mouse IgM (PerCP-Cy5.5 conjugated)  Goat anti-rabbit IgG (Cy3-conjugated) | WB  WB  ChIP  WB, IHC, IF  WB, IF  WB  WB  IHC  IF  IF  WB  WB, IHC, ChIP  WB  WB  IHC  IHC  RIP  RIP  FCM  FCM  ChIP  ChIP, RIP  FCM  FCM  IF | Novus Biologicals, Cat. # NB600-600  Proteintech, Cat. # 18989-1-AP  Abcam, Cat. # ab26056  Absin, Cat. # abs119633a  Absin, Cat. # abs124498a  Proteintech, Cat. # 20276-1-AP  Abcam, Cat. # ab52771  Abcam, Cat. # ab70565  Sigma, Cat. # P5282  Sigma, Cat. # N5413  Proteintech, Cat. # 20567-1-AP  Abcam, Cat. # ab179940  Abcam, Cat. # ab8227  Abnova, Cat. # PAB20216  Abcam, Cat.# ab191077  Gene Tex, Cat. # GTX111253  Abcam, Cat. # ab32381  Abcam, Cat. # ab290  eBioscience, Cat. # 12-1331  BD Pharmingen, Cat. # 561560  Cell Signaling, Cat. # 5415  Abcam, Cat. # ab27478  eBioscience, Cat. # 12-4301  BD Pharmingen, Cat. # 560857  Abcam, Cat. # ab6939 |
